# Supplementary material
Source: publisher figshare collection journal article supplement (https://sage.figshare.com/ndownloader/files/22214088)
Supplement: Supplementary file 1 [file 22214088]

**Supplementary Table 1**

*Separate results for each participant in AB and CD stimulations.*

For each participant, the frequency of stuttered syllables, the mean of the three highest stuttering moments and speech rate were analyzed to decide if TENS was effective, harmful, or had no effect. For the frequency of stuttered syllables and the mean of the three highest stuttering moments, a decrease of at least 20% was considered a positive result. For speech rate, an increase of at least 120% was considered a positive result. Using these guidelines, TENS was considered effective if (a) all three measures improved after stimulation; (b) two measures improved after stimulation, while the other one was not different; (c) two measures improved after stimulation, while the other one worsened; or (d) one measure improved after stimulation, while the others two were not different. TENS was considered harmful if (a) all three measures worsened after stimulation; (b) two measures worsened after stimulation, while the other one was not different; (c) two measures worsened after stimulation, while the other one improved; or (d) one measure worsened after stimulation, while the others two were not different. TENS was considered to have had no effect if, following stimulation, all three measures were not different or one measure improved, one measure worsened, and one measure was not different.

| Participant Number | AB Stimulation                                                                                                                                                                                                                                                                                               | CD Stimulation                                                                                                                                                                                                                                                                           | Positive Effects       |
|--------------------|--------------------------------------------------------------------------------------------------------------------------------------------------------------------------------------------------------------------------------------------------------------------------------------------------------------|------------------------------------------------------------------------------------------------------------------------------------------------------------------------------------------------------------------------------------------------------------------------------------------|------------------------|
| 1                  | Speech rate increased 126% after stimulation (i.e, from 119 to 150 fluent syllables per minute). Neither the percentage of stuttered syllables nor the mean of the three highest stuttering moments were different from pre- to post-stimulation.                                                            | The percentage of stuttered syllables decreased 20% after stimulation (from 48.1% to 38.5%). Speech rate increased 132% after stimulation (from 56 to 74 fluent syllables per minute). The mean of the three highest stuttering moments was not different from pre- to post-stimulation. | AB and CD stimulations |
| 2                  | The percentage of stuttered syllables decreased 33% after stimulation (from 20% to 13.5%). The mean of the three highest stuttering moments decreased 22% after stimulation (from 2.68 seconds to 2.08 seconds). Speech rate increased 123% after stimulation (from 146 to 179 fluent syllables per minute). | The mean of the three highest stuttering moments increased 168% after stimulation (from 1.02 second to 1.71 second). The percentage of stuttered syllables and speech rate were not different from pre- to post-stimulation.                                                             | AB stimulation         |

| Participant Number | AB Stimulation                                                                                                                                                                                                                                                                        | CD Stimulation                                                                                                                                                                                                                                                                     | Positive Effects |
|--------------------|---------------------------------------------------------------------------------------------------------------------------------------------------------------------------------------------------------------------------------------------------------------------------------------|------------------------------------------------------------------------------------------------------------------------------------------------------------------------------------------------------------------------------------------------------------------------------------|------------------|
| 3                  | The percentage of stuttered syllables decreased 52% after stimulation (from 6.9% to 3.3%). Speech rate increased 131% after stimulation (from 165 to 216 fluent syllables per minute). The mean of the three highest stuttering moments was not different pre- and post- stimulation. | Neither the percentage of stuttered syllables, the mean of the three highest stuttering moments, or speech rate were different stimulation.                                                                                                                                        | AB stimulation   |
| 4                  | The percentage of stuttered syllables decreased 27% after stimulation (from 9.5% to 6.9%). The mean of the three highest stuttering moments decreased 31% after stimulation (from 2.36 seconds to 1.62 second).<br>Speech rate was not different pre- and post-stimulation.           | The percentage of stuttered syllables increased 159% after stimulation (from 7.5% to 11.9%). Speech rate decreased 32% after stimulation (from 259 to 175 fluent syllables per minute). The mean of the three highest stuttering moments did not differ pre- and post-stimulation. | AB stimulation   |

| Participant Number | AB Stimulation                                                                                                                                                                                                                                                              | CD Stimulation                                                                                                                                                                                                                                                                         | Positive Effects       |
|--------------------|-----------------------------------------------------------------------------------------------------------------------------------------------------------------------------------------------------------------------------------------------------------------------------|----------------------------------------------------------------------------------------------------------------------------------------------------------------------------------------------------------------------------------------------------------------------------------------|------------------------|
| 5                  | The percentage of stuttered syllables decreased 27% after stimulation (from 8.4% to 6.1%). The means of the three highest stuttering moments and speech rate were not different pre- and post- stimulation.                                                                 | The percentage of stuttered syllables decreased 49% after stimulation (from 7.1% to 3.6%). The means of the three highest stuttering moments and speech rate were not different pre- and post- stimulation.                                                                            | AB and CD stimulations |
| 6                  | The percentage of stuttered syllables decreased 36% after stimulation (from 4.4% to 2.8%). The mean of the three highest stuttering moments decreased 50% after stimulation (from 1.89 second to 0.95 second).<br>Speech rate was not different pre- and post- stimulation. | The percentage of stuttered syllables increased 159% after stimulation (from 2.2% to 3.5%). Speech rate increased 154% after stimulation (from 165 to 254 fluent syllables per minute). The mean of the three highest stuttering moments was not different pre- and post- stimulation. | AB stimulation         |

| Participant Number | AB Stimulation                                                                                                                                                                                                                                                                                                        | CD Stimulation                                                                                                                                                                                                     | Positive Effects |
|--------------------|-----------------------------------------------------------------------------------------------------------------------------------------------------------------------------------------------------------------------------------------------------------------------------------------------------------------------|--------------------------------------------------------------------------------------------------------------------------------------------------------------------------------------------------------------------|------------------|
| 7                  | <p>The percentage of stuttered syllables decreased 21% after stimulation (from 7% to 5.5%). The mean of the three highest stuttering moments decreased 32% after stimulation (from 0.77 second to 0.52 second).</p> <p>Speech rate decreased 20% after stimulation (from 222 to 178 fluent syllables per minute).</p> | Not done.                                                                                                                                                                                                          | AB stimulation   |
| 8                  | <p>The mean of the three highest stuttering moments increased 191% after stimulation (from 1.46 second to 2.79 seconds). Speech rate decreased 36% after stimulation (from 245 to 156 fluent syllables per minute). The percentage of stuttered syllables was not different pre- and post-stimulation.</p>            | <p>The percentage of stuttered syllables decreased 39% after stimulation (from 9.7% to 5.9%). The means of the three highest stuttering moments and speech rate were not different pre- and post- stimulation.</p> | CD stimulation   |

| Participant Number | AB Stimulation                                                                                                                                                                                                                                                                       | CD Stimulation                                                                                                                                                                                                                            | Positive Effects       |
|--------------------|--------------------------------------------------------------------------------------------------------------------------------------------------------------------------------------------------------------------------------------------------------------------------------------|-------------------------------------------------------------------------------------------------------------------------------------------------------------------------------------------------------------------------------------------|------------------------|
| 9                  | The percentage of stuttered syllables, the mean of the three highest stuttering moments, and speech rate were not different pre- and post- stimulation.                                                                                                                              | Speech rate increased 134% after stimulation (from 222 to 298 fluent syllables per minute). Neither the percentage of stuttered syllables nor the mean of the three highest stuttering moments were different pre- and post- stimulation. | CD stimulation         |
| 10                 | The percentage of stuttered syllables decreased 77% after stimulation (from 5.6% to 1.3%). Speech rate increased 159% after stimulation (from 200 to 317 fluent syllables per minute). The mean of the three highest stuttering moments was not different pre- and post-stimulation. | The mean of the three highest stuttering moments decreased 30% after stimulation (from 1.02 second to 0.71 second). The percentage of stuttered syllables and speech rate were not different pre- and post-stimulation.                   | AB and CD stimulations |

| Participant<br>Number | AB Stimulation                                                                                                                                                                                                                                                       | CD Stimulation                                                                                                                                                                                                                                                               | Positive<br>Effects |
|-----------------------|----------------------------------------------------------------------------------------------------------------------------------------------------------------------------------------------------------------------------------------------------------------------|------------------------------------------------------------------------------------------------------------------------------------------------------------------------------------------------------------------------------------------------------------------------------|---------------------|
| 11                    | Neither the percentage of stuttered syllables, the mean of the three highest stuttering moments, nor speech rate differed pre- and post-stimulation.                                                                                                                 | The percentage of stuttered syllables decreased 50% after stimulation (from 12.1% to 6.1%). The mean of the three highest stuttering moments increased 168% after stimulation (from 0.91 second to 1.53 second).<br>Speech rate was not different pre- and post-stimulation. | None                |
| 12                    | The percentage of stuttered syllables decreased 27% after stimulation (from 3% to 2.2%). The mean of the three highest stuttering moments decreased 32% after stimulation (from 0.73 second to 0.5 second). Speech rate was not different pre- and post-stimulation. | Neither the percentage of stuttered syllables, the mean of the three highest stuttering moments, nor speech rate differed pre- and post- stimulation.                                                                                                                        | AB<br>stimulation   |

| Participant<br>Number | AB Stimulation                                                                                                                                                                                                              | CD Stimulation                                                                                                                                                                                                                                                                                               | Positive<br>Effects    |
|-----------------------|-----------------------------------------------------------------------------------------------------------------------------------------------------------------------------------------------------------------------------|--------------------------------------------------------------------------------------------------------------------------------------------------------------------------------------------------------------------------------------------------------------------------------------------------------------|------------------------|
| 13                    | The mean of the three highest stuttering moments decreased 43% after stimulation (from 4.61 seconds to 2.64 seconds). Neither the percentage of stuttered syllables nor the speech rate differed pre- and post-stimulation. | The percentage of stuttered syllables decreased 24% after stimulation (from 7.9% to 6%). The mean of the three highest stuttering moments decreased 51% after stimulation (from 3.87 seconds to 1.89 second).<br>Speech rate was not different pre- and post-stimulation.                                    | AB and CD stimulations |
| 14                    | Not done.                                                                                                                                                                                                                   | The percentage of stuttered syllables decreased 44% after stimulation (from 3.6% to 2%). The mean of the three highest stuttering moments decreased 71% after stimulation (from 2.52 seconds to 0.73 second).<br>Speech rate increased 125% after stimulation (from 207 to 259 fluent syllables per minute). | CD stimulation         |
